# Supplementary material
Source: PubMed Central journal article supplement (PMC4313397)
Supplement: Supp_Table1.pdf [file Supp_Table1.pdf]

## Supplementary Data

SUPPLEMENTARY TABLE S1. MONTREAL NEUROLOGICAL INSTITUTE COORDINATES FOR REGIONS OF INTEREST IN THE DMN, DAN, AND FPTC

|      |          |     |     |     |
|------|----------|-----|-----|-----|
| FPTC | RdIPFC   | 46  | 28  | 31  |
| FPTC | LdIPFC   | -44 | 27  | 33  |
| FPTC | Rfrontal | 44  | 8   | 34  |
| FPTC | Lfrontal | -42 | 7   | 36  |
| FPTC | RIPL     | 54  | -44 | 43  |
| FPTC | LIPL     | -53 | -50 | 39  |
| FPTC | RIPS     | 32  | -59 | 41  |
| FPTC | LIPS     | -32 | -58 | 46  |
| DMN  | PCC      | 1   | -51 | 29  |
| DMN  | mPFC     | -1  | 61  | 22  |
| DMN  | LAG      | -48 | -66 | 34  |
| DMN  | RAG      | 53  | -61 | 35  |
| DMN  | Llattemp | -65 | -23 | -9  |
| DMN  | Rlattemp | 61  | -21 | -12 |
| DAN  | LpIPS    | -26 | -65 | 52  |
| DAN  | LFEF     | -29 | -5  | 55  |
| DAN  | RpIPS    | 28  | -65 | 51  |
| DAN  | RFEF     | 31  | -5  | 54  |
| DAN  | RaIPS    | 43  | -36 | 46  |
| DAN  | LaIPS    | -45 | -37 | 48  |

DAN, dorsal attention network; dIPFC, dorsal lateral prefrontal cortex; DMN, default mode network; FPTC, fronto-parietal task control network; IPS, intraparietal sulcus; LAG, left angular gyrus; mPFC, medial prefrontal cortex; PCC, posterior cingulate cortex; RAG, right angular gyrus.
