# Supplementary material
Source: PubMed Central journal article supplement (PMC4313397)
Supplement: Supp_Tables2-4.pdf [file Supp_Tables2-4.pdf]

SUPPLEMENTARY TABLE S2. FACTOR LOADINGS FOR DAN DURING RESTING STATE  
(ENTIRE SAMPLE, ACROSS TWO SESSIONS)

|                   | <i>Factor 1</i> | <i>Factor 2</i> | <i>Factor 3</i> | <i>Factor 4</i> |
|-------------------|-----------------|-----------------|-----------------|-----------------|
| DANLpIPS.DANRpIPS | 0.525           | 0.198           | 0.062           | -0.090          |
| DANLpIPS.DANRaIPS | 0.545           | 0.151           | 0.182           | 0.003           |
| DANLpIPS.DANLaIPS | 0.624           | 0.028           | -0.011          | 0.111           |
| DANRpIPS.DANRaIPS | 0.512           | 0.191           | 0.127           | -0.016          |
| DANRpIPS.DANLaIPS | 0.620           | 0.055           | 0.010           | 0.118           |
| DANRaIPS.DANLaIPS | 0.452           | 0.060           | 0.219           | 0.146           |
| DANLFEF.DANRaIPS  | 0.171           | 0.208           | 0.893           | 0.068           |
| DANLFEF.DANLaIPS  | 0.263           | 0.150           | 0.490           | 0.333           |
| DANRFEF.DANRaIPS  | 0.044           | 0.406           | 0.410           | 0.384           |
| DANRFEF.DANLaIPS  | 0.101           | 0.255           | 0.178           | 0.932           |
| DANLpIPS.DANRFEF  | 0.162           | 0.622           | 0.047           | 0.275           |
| DANRpIPS.DANRFEF  | 0.099           | 0.684           | -0.026          | 0.191           |
| DANLFEF.DANRpIPS  | 0.210           | 0.550           | 0.236           | -0.070          |
| DANLpIPS.DANLFEF  | 0.263           | 0.495           | 0.262           | -0.057          |
| DANLFEF.DANRFEF   | 0.038           | 0.420           | 0.261           | 0.175           |

Factors 1–4 explain 13.8%, 13.2%, 10.2%, and 8.9% of the variance, respectively (46.2% of the total variance). Factor loadings >0.4 are shaded gray.

SUPPLEMENTARY TABLE S3. FACTOR LOADINGS FOR DMN DURING RESTING STATE  
(ENTIRE SAMPLE, ACROSS TWO SESSIONS)

|                | <i>Factor 1</i> | <i>Factor 2</i> | <i>Factor 3</i> | <i>Factor 4</i> |
|----------------|-----------------|-----------------|-----------------|-----------------|
| DMNPCC.DMNmPFC | 0.173           | 0.093           | 0.626           | 0.183           |
| DMNmPFC.DMNLAG | 0.148           | 0.156           | 0.809           | 0.099           |
| DMNmPFC.DMNRAG | 0.133           | 0.139           | 0.596           | 0.233           |
| DMNPCC.DMNLLT  | 0.680           | 0.181           | 0.140           | 0.160           |
| DMNLAG.DMNLLT  | 0.695           | 0.236           | 0.161           | 0.083           |
| DMNRAG.DMNLLT  | 0.635           | 0.185           | 0.069           | 0.155           |
| DMNPCC.DMNRLT  | 0.187           | 0.598           | 0.050           | 0.173           |
| DMNLAG.DMNRLT  | 0.187           | 0.780           | 0.117           | 0.106           |
| DMNRAG.DMNRLT  | 0.120           | 0.649           | 0.020           | 0.120           |
| DMNPCC.DMNLAG  | 0.146           | 0.060           | 0.277           | 0.433           |
| DMNPCC.DMNRAG  | 0.092           | 0.072           | 0.123           | 0.983           |
| DMNLAG.DMNRAG  | 0.173           | 0.184           | 0.192           | 0.384           |
| DMNmPFC.DMNLLT | 0.487           | 0.131           | 0.338           | 0.042           |
| DMNmPFC.DMNRLT | 0.098           | 0.365           | 0.211           | 0.056           |
| DMNLLT.DMNRLT  | 0.042           | 0.166           | 0.041           | -0.019          |

Factors 1–4 explain 12.1%, 11.9%, 11.7%, and 10.1% of the variance, respectively (45.8% of the total variance). Factor loadings >0.4 are shaded gray.

SUPPLEMENTARY TABLE S4. FACTOR LOADINGS FOR FPTC DURING RESTING STATE  
(ENTIRE SAMPLE, ACROSS TWO SESSIONS)

|                       | <i>Factor 1</i> | <i>Factor 2</i> | <i>Factor 3</i> | <i>Factor 4</i> |
|-----------------------|-----------------|-----------------|-----------------|-----------------|
| FPTCLdIPFC.FPTCRIPL   | 0.496           | 0.081           | 0.039           | 0.208           |
| FPTCLF.FPTCRIPL       | 0.447           | 0.095           | 0.540           | -0.076          |
| FPTCRIPL.FPTCLIPL     | 0.291           | 0.205           | 0.041           | 0.048           |
| FPTCRIPL.FPTCRIPS     | 0.521           | 0.175           | -0.025          | 0.047           |
| FPTCRIPL.FPTCLIPS     | 0.540           | 0.188           | 0.047           | 0.031           |
| FPTCLF.FPTCLIPL       | 0.381           | -0.001          | 0.570           | 0.002           |
| FPTCLF.FPTCRIPS       | 0.052           | 0.308           | 0.514           | 0.212           |
| FPTCLF.FPTCLIPS       | -0.059          | 0.244           | 0.584           | 0.228           |
| FPTCLdIPFC.FPTCRF     | 0.147           | 0.418           | 0.098           | 0.254           |
| FPTCRF.FPTCLF         | 0.082           | 0.365           | 0.322           | 0.017           |
| FPTCRF.FPTCLIPL       | 0.424           | 0.402           | 0.110           | -0.007          |
| FPTCRF.FPTCRIPS       | 0.133           | 0.655           | 0.109           | 0.160           |
| FPTCRF.FPTCLIPS       | 0.136           | 0.733           | 0.118           | 0.101           |
| FPTCRdIPFC.FPTCLdIPFC | 0.159           | 0.048           | 0.139           | 0.394           |
| FPTCRdIPFC.FPTCLF     | 0.059           | 0.164           | 0.509           | 0.184           |
| FPTCRdIPFC.FPTCRIPS   | 0.124           | 0.299           | 0.153           | 0.355           |
| FPTCRdIPFC.FPTCRF     | 0.176           | 0.497           | 0.136           | 0.100           |
| FPTCRdIPFC.FPTCRIPL   | 0.492           | 0.108           | 0.151           | 0.032           |
| FPTCRdIPFC.FPTCLIPL   | 0.480           | 0.055           | 0.154           | 0.173           |
| FPTCRdIPFC.FPTCLIPS   | 0.091           | 0.278           | 0.166           | 0.369           |
| FPTCLdIPFC.FPTCLF     | -0.001          | 0.013           | 0.422           | 0.323           |
| FPTCLdIPFC.FPTCLIPL   | 0.440           | -0.027          | 0.051           | 0.283           |
| FPTCLdIPFC.FPTCRIPS   | 0.195           | 0.171           | 0.079           | 0.663           |
| FPTCLdIPFC.FPTCLIPS   | 0.110           | 0.098           | 0.111           | 0.677           |
| FPTCRF.FPTCRIPL       | 0.424           | 0.396           | 0.062           | -0.069          |
| FPTCLIPL.FPTCRIPS     | 0.454           | 0.141           | 0.030           | 0.146           |
| FPTCLIPL.FPTCLIPS     | 0.508           | 0.073           | 0.051           | 0.166           |
| FPTCRIPS.FPTCLIPS     | 0.199           | 0.329           | 0.074           | 0.217           |

Factors 1–4 explain 10.6%, 8.9%, 7.1%, and 6.9% of the variance, respectively (33.5% of the total variance). Factor loadings >0.4 are shaded gray.
