# Supplementary material
Source: PubMed Central journal article supplement (PMC4313397)
Supplement: Supp_Tables5-7.pdf [file Supp_Tables5-7.pdf]

SUPPLEMENTARY TABLE S5. MEAN CORRELATIONS BETWEEN NODES IN THE DAN (AVERAGE OF TWO SESSIONS)  
AND RELIABILITY OF THESE CORRELATIONS ACROSS SESSIONS

|                   | <i>LpIPS</i> | <i>LFEF</i> | <i>RpIPS</i> | <i>RFEF</i> | <i>RaIPS</i> | <i>LaIPS</i> |
|-------------------|--------------|-------------|--------------|-------------|--------------|--------------|
| Mean correlations |              |             |              |             |              |              |
| LpIPS             |              |             |              |             |              |              |
| LFEF              | 0.24         |             |              |             |              |              |
| RpIPS             | 0.56         | 0.26        |              |             |              |              |
| RFEF              | 0.23         | 0.46        | 0.26         |             |              |              |
| RaIPS             | 0.38         | 0.22        | 0.41         | 0.27        |              |              |
| LaIPS             | 0.44         | 0.25        | 0.36         | 0.26        | 0.54         |              |
| Reliability       |              |             |              |             |              |              |
| LpIPS             |              |             |              |             |              |              |
| LFEF              | 0.47         |             |              |             |              |              |
| RpIPS             | 0.54         | 0.20        |              |             |              |              |
| RFEF              | 0.06         | 0.77        | 0.51         |             |              |              |
| RaIPS             | 0.35         | 0.54        | 0.16         | 0.40        |              |              |
| LaIPS             | 0.45         | 0.45        | 0.62         | 0.19        | 0.46         |              |

SUPPLEMENTARY TABLE S6. MEAN CORRELATIONS BETWEEN NODES IN THE DMN (AVERAGE OF TWO SESSIONS)  
AND RELIABILITY OF THESE CORRELATIONS ACROSS SESSIONS

|                   | <i>PCC</i> | <i>mPFC</i> | <i>LAG</i> | <i>RAG</i> | <i>Llatemp</i> | <i>Rlattemp</i> |
|-------------------|------------|-------------|------------|------------|----------------|-----------------|
| Mean correlations |            |             |            |            |                |                 |
| PCC               |            |             |            |            |                |                 |
| mPFC              | 0.34       |             |            |            |                |                 |
| LAG               | 0.55       | 0.30        |            |            |                |                 |
| RAG               | 0.44       | 0.30        | 0.57       |            |                |                 |
| Llatemp           | 0.25       | 0.25        | 0.29       | 0.25       |                |                 |
| Rlattemp          | 0.13       | 0.18        | 0.15       | 0.24       | 0.41           |                 |
| Reliability       |            |             |            |            |                |                 |
| PCC               |            |             |            |            |                |                 |
| mPFC              | 0.62       |             |            |            |                |                 |
| LAG               | 0.52       | 0.62        |            |            |                |                 |
| RAG               | 0.67       | 0.55        | 0.45       |            |                |                 |
| Llatemp           | 0.34       | 0.60        | 0.61       | 0.51       |                |                 |
| Rlattemp          | 0.41       | 0.39        | 0.58       | 0.53       | 0.30           |                 |

SUPPLEMENTARY TABLE S7. MEAN CORRELATIONS BETWEEN NODES IN THE FPTC (AVERAGE OF TWO SESSIONS)  
AND RELIABILITY OF THESE CORRELATIONS ACROSS SESSIONS

|                   | <i>RdlPFC</i> | <i>LdlPFC</i> | <i>Rfrontal</i> | <i>Lfrontal</i> | <i>RIPL</i> | <i>LIPL</i> | <i>RIPS</i> | <i>LIPS</i> |
|-------------------|---------------|---------------|-----------------|-----------------|-------------|-------------|-------------|-------------|
| Mean correlations |               |               |                 |                 |             |             |             |             |
| RdlPFC            |               |               |                 |                 |             |             |             |             |
| LdlPFC            | 0.37          |               |                 |                 |             |             |             |             |
| Rfrontal          | 0.30          | 0.21          |                 |                 |             |             |             |             |
| Lfrontal          | 0.28          | 0.29          | 0.35            |                 |             |             |             |             |
| RIPL              | 0.25          | 0.17          | 0.23            | 0.12            |             |             |             |             |
| LIPL              | 0.19          | 0.25          | 0.18            | 0.18            | 0.47        |             |             |             |
| RIPS              | 0.23          | 0.15          | 0.22            | 0.21            | 0.31        | 0.27        |             |             |
| LIPS              | 0.25          | 0.28          | 0.23            | 0.31            | 0.28        | 0.35        | 0.52        |             |
| Reliability       |               |               |                 |                 |             |             |             |             |
| RdlPFC            |               |               |                 |                 |             |             |             |             |
| LdlPFC            | 0.25          |               |                 |                 |             |             |             |             |
| Rfrontal          | 0.23          | 0.63          |                 |                 |             |             |             |             |
| Lfrontal          | 0.31          | 0.16          | 0.16            |                 |             |             |             |             |
| RIPL              | 0.45          | 0.65          | 0.41            | 0.34            |             |             |             |             |
| LIPL              | 0.48          | 0.05          | 0.38            | 0.46            | 0.28        |             |             |             |
| RIPS              | 0.47          | 0.40          | 0.32            | 0.37            | 0.17        | 0.54        |             |             |
| LIPS              | 0.36          | 0.45          | 0.38            | 0.34            | 0.37        | 0.60        | 0.47        |             |
